# Supplementary material for: Sea star wasting disease demography and etiology in the brooding sea star Leptasterias spp
Source: PLoS One. 2019 Nov 21;14(11):e0225248. doi: 10.1371/journal.pone.0225248 (PMC6872156; doi:10.1371/journal.pone.0225248)
Supplement: S1 Table — “Map color” correspond to colored regions in Fig 1. “Leptasterias counted” and “abundance rank” columns refers to combined data (see methods). “Leptasterias/observer hour” column refers to Cohen Lab timed counts. “Observer hours” column refers to Cohen Lab timed counts. “Data used in Fig 2” column indicates whether data were included in Fig 2, our heatmap. “Previous die-off observed [32]” column indicates whether population declines were reported in Leptasterias during a HAB event in [32]. “Source” column indicates where data came from: Cohen lab timed counts (“Cohen TC”), Cohen lab data not exclusively collected for population abundance monitoring (“Cohen other”), the MARINe online repository [35]: https://www.eeb.ucsc.edu/pacificrockyintertidal/data-products/sea-star-wasting/ (“MARINe”), or from [32] (Jurgens et al.). (XLSX) [file pone.0225248.s001.xlsx]

## Sheet: Sheet1
Fig 1 map color	sites	latitude	longitude	date	Leptasterias counted	abundance rank	Leptasterias/observer hour	observer hours	data used in Fig 2	previous die-off observed [32]	source
	Point St. George	41.776782	-124.2511637	4 jun 2016	91	>10	61	1.4918	YES		Cohen TC
	Battery Point	41.7440932	-124.2052835	5 Jun 2016	132	>10	132	1	YES		Cohen TC
	Enderts	41.7187608	-124.1471997	4 Dec 2010	28	>10	NA		YES		MARINe
	Enderts	41.7187608	-124.1471997	21 May 2011	101	>100	NA		YES		MARINe
	Enderts	41.7187608	-124.1471997	13 Dec 2012	31	>10	NA		YES		MARINe
	Enderts	41.7187608	-124.1471997	3 Dec 2013	68	>10	NA		YES		MARINe
	Enderts	41.7187608	-124.1471997	14 May 2013	220	>100	NA		YES		MARINe
	Enderts	41.7187608	-124.1471997	5 Dec 2014	968	>500	NA		YES		MARINe
	Enderts	41.7187608	-124.1471997	17 May 2015	890	>500	NA		YES		MARINe
	Enderts	41.7187608	-124.1471997	24 Jan 2016	1528	>500	NA		YES		MARINe
	Enderts	41.7187608	-124.1471997	25 May 2016	951	>500	NA				MARINe
	Damnation Creek	41.665699	-124.1409226	12 Dec 2012	1	1 - 10	NA		YES		MARINe
	Damnation Creek	41.665699	-124.1409226	18 May 2015	0	0	NA		YES		MARINe
	Damnation Creek	41.665699	-124.1409226	12 Dec 2016	1	1 - 10	NA		YES		MARINe
	False Klamath	41.5989241	-124.1096716	2 Dec 2010	47	>10	NA		YES		MARINe
	False Klamath	41.5989241	-124.1096716	19 May 2011	57	>10	NA		YES		MARINe
	False Klamath	41.5989241	-124.1096716	11 Dec 2012	36	>10	NA		YES		MARINe
	False Klamath	41.5989241	-124.1096716	1 Dec 2013	71	>10	NA		YES		MARINe
	False Klamath	41.5989241	-124.1096716	16 May 2014	84	>10	NA				MARINe
	False Klamath	41.5989241	-124.1096716	3 Dec 2014	753	>500	NA		YES		MARINe
	False Klamath	41.5989241	-124.1096716	16 May 2015	1567	>500	NA		YES		MARINe
	False Klamath	41.5989241	-124.1096716	21 Jan 2016	561	>500	NA		YES		MARINe
	False Klamath	41.5989241	-124.1096716	22 May 2016	450	>10	NA				MARINe
	False Klamath	41.5989241	-124.1096716	7 June 2016	49	>10	53.45	0.916745			Cohen TC
	Rocky Point	41.138472	-124.1724372	9 June 2016	158	>100	316	0.5	YES		Cohen TC
	Palmer's Point	41.1307285	-124.1615164	8 June 2016	187	>100	160.29	1.16664	YES		Cohen TC
	Scotty's Point	41.1007921	-124.1741904	9 Apr 2016	889	>500	530	1.67736	YES		Cohen TC
	Bakers	41.0514724	-124.1275508	10 Apr 2016	53	>10	18	2.94444	YES		Cohen TC
	Luffenholtz	41.0402712	-124.1225214	10 Apr 2016	265	>100	140	1.89286	YES		Cohen TC
	Cape Mendocino	40.4401471	-124.4182548	26 June 2013	3	1-10	NA		YES		MARINe
	Cape Mendocino	40.4401471	-124.4182548	18 June 2014	12	>10	NA		YES		MARINe
	Cape Mendocino	40.4401471	-124.4182548	18 June 2015	79	>10	NA		YES		MARINe
	Cape Mendocino	40.4401471	-124.4182548	8 June 2016	29	>10	NA		YES		MARINe
	Shelter Cove	40.0304368	-124.0818414	17 June 2014	11	>10	NA		YES		MARINe
	Shelter Cove	40.0304368	-124.0818414	7 June 2016	2	1-10	NA		YES		MARINe
	Kibessillah	39.604228	-123.790966	14 Jun 2014	35	>10	NA		YES		MARINe
	Kibessillah	39.604228	-123.790966	6 Jun 2015	6	1-10	NA		YES		MARINe
	Kibessillah	39.604228	-123.790966	3 July 2015	0 (1 obs. hour)	0	0	1	YES		Cohen TC
	Kibessillah	39.604228	-123.790966	6 Feb 2016	0 (2.9 obs. hours)	0	0	2.9	YES		Cohen TC
	Kibessillah	39.604228	-123.790966	6 Jun 2016	23	>10	NA		YES		MARINe
	MacKerricher	39.4884543	-123.7900444	1 Aug 2015	7	1 - 10	8.4	0.833333	YES		Cohen TC
	MacKerricher	39.4884543	-123.7900444	26 Nov 2015	4	1 - 10	2.35	1.70213			Cohen TC
	MacKerricher	39.4884543	-123.7900444	19 Feb 2016	4	1 - 10	1.77	2.25989	YES		Cohen TC
	MacKerricher	39.4884543	-123.7900444	4 July 2016	2	1 - 10	1.5	1.33333			Cohen TC
	Glass Beach	39.4526132	-123.8156819	7 June 2015	1	1 - 10	0.5	2			Cohen TC
	Glass Beach	39.4526132	-123.8156819	30 July 2015	6	1 - 10	7.2	0.833333	YES		Cohen TC
	Glass Beach	39.4526132	-123.8156819	12 Nov 2015	4	1 - 10	0.46	8.69565			Cohen TC
	Glass Beach	39.4526132	-123.8156819	10 Jan 2016	7	1 - 10	4.05	1.7284	YES		Cohen TC
	Glass Beach	39.4526132	-123.8156819	19 Feb 2016	2	1 - 10	1.6	0.8			Cohen TC
	Glass Beach	39.4526132	-123.8156819	15 Oct 2016	0 (0.5 obs. hours)	0	0	0.5			Cohen TC
	Glass Beach	39.4526132	-123.8156819	17 Oct 2016	5	1 - 10	2.72727	1.83333			Cohen TC
	Belinda Point	39.3978317	-123.8213606	7 Feb 2016	4	1 - 10	3	1.33333			Cohen TC
	Belinda Point	39.3978317	-123.8213606	25 Jun 2016	14	>10	6.5	2.15385	YES		Cohen TC
	Russian Gulch	39.3312799	-123.7791011	9 Jan 2016	10	1 - 10	6	1.66667	YES		Cohen TC
	Russian Gulch	39.3312799	-123.7791011	12 Dec 2016	6	1 - 10	12	0.5			Cohen TC
	Mendocino Headlands	39.3089747	-123.8084228	11 Sep 2015	0 (0.5 obs. hours)	0		0.5	YES		Cohen TC
	Mendocino Headlands	39.3089747	-123.8084228	29 Apr 2016	1	1 - 10	0.95	1.05263			Cohen TC
	Mendocino Headlands	39.3089747	-123.8084228	9 May 2016	0 (0.6 obs. hours)	0	0	0.6			Cohen TC
	Mendocino Headlands	39.3089747	-123.8084228	10 May 2016	5	1 - 10	4.29	1.1655	YES		Cohen TC
	Van Damme	39.2827288	-123.7612892	17 Jun 2015	6	1 - 10	7.2	0.833333			Cohen TC
	Van Damme	39.2827288	-123.7612892	2 Jul 2015	4	1 - 10	0.666667	6			Cohen TC
	Van Damme	39.2827288	-123.7612892	13 Nov 2015	6	1 - 10	1.64	3.65854			Cohen TC
	Van Damme	39.2827288	-123.7612892	25 Nov 2015	7	1 - 10	3.5	2	YES		Cohen TC
	Van Damme	39.2827288	-123.7612892	3 Jul 2016	0 (1.1 obs. hours)	0	0	1.1	YES		Cohen TC
	Van Damme	39.2827288	-123.7612892	11 Jun 2017	0 (0.8 obs. hours)	0	0	0.8			Cohen TC
	Elk	39.126794	-123.7202123	11 Nov 2015	1	1 - 10	0.181	5.5	YES		Cohen TC
	Elk	39.126794	-123.7202123	8 Jan 2016	2	1 - 10	1.33	1.50376			Cohen TC
	Elk	39.126794	-123.7202123	9 May 2016	3	1 - 10	5.14	0.583658	YES		Cohen TC
	Stornetta	38.93787003	-123.72880	2004	12	>10	NA		YES		Jurgens et al.
	Stornetta	38.93787003	-123.72880	2007	10	1 - 10	NA				Jurgens et al.
	Stornetta	38.93787003	-123.72880	15 Jun 2011	8	1 - 10	NA		YES		MARINe
	Stornetta	38.93787003	-123.72880	23 Jun 2013	110	>100	NA		YES		MARINe
	Stornetta	38.93787003	-123.72880	16 Jun 2015	64	>10	NA		YES		MARINe
	Stornetta	38.93787003	-123.72880	18 Jun 2015	28	>10	37.3333	0.75			Cohen TC
	Stornetta	38.93787003	-123.72880	3 Jul 2015	22	>10	26.4	0.833333			Cohen TC
	Stornetta	38.93787003	-123.72880	23 Dec 2015	18	>10	0.947368	19			Cohen TC
	Stornetta	38.93787003	-123.72880	8 May 2016	13	>10	13	1	YES		Cohen TC
	Point Arena	38.911199	-123.72886	2010	12	>10	NA		YES		Jurgens et al.
	Point Arena	38.911199	-123.72886	18 Jun 2015	14	>10	42	0.333333	YES		Cohen TC
	Point Arena	38.911199	-123.72886	3 Jul 2015	2	1 - 10	4	0.5			Cohen TC
	Point Arena	38.911199	-123.72886	23 Jul 2016	5	1 - 10	8.57143	0.583333	YES		Cohen TC
	Moat Creek	38.8964776	-123.6740693	2010	10	1 - 10	NA		YES	X	Jurgens et al.
	Moat Creek	38.8964776	-123.6740693	28 Jun 2010	2	1 - 10	NA			X	MARINe
	Moat Creek	38.8964776	-123.6740693	4 May 2011	2	1 - 10	NA		YES	X	MARINe
	Moat Creek	38.8964776	-123.6740693	2012	20	>10	NA		YES	X	Jurgens
	Moat Creek	38.8964776	-123.6740693	27 Sep 2015	0 (1.2 obs. hours)	0	0	1.2	YES	X	Cohen TC
	Moat Creek	38.8964776	-123.6740693	23 Jul 2016	0 (0.7 obs. hours)	0	0	0.7	YES	X	Cohen TC
	Iversen Saunders Reef	38.7932	-123.751	2010	6	1 - 10	NA		YES	X	Jurgens et al.
	Iversen Saunders Reef	38.7931688	-123.7506018	6 May 2011	2	1 - 10	NA		YES	X	MARINe
	Iversen Saunders Reef	38.7932	-123.751	2012	2	1 - 10	NA		YES	X	Jurgens et al.
	Del Mar Landing	38.7431362	-123.515555	17 May 2011	15	>10	NA		YES	X	MARINe
	Sea Ranch	38.7152058	-123.463208	2001	28	>10	NA			X	Jurgens et al.
	Sea Ranch	38.7152058	-123.463208	2005	16	>10	NA		YES	X	Jurgens et al.
	Sea Ranch	38.7152058	-123.463208	2010	7	1 - 10	NA		YES	X	Jurgens et al.
	Sea Ranch	38.7152058	-123.463208	2012	0	0	NA		YES	X	Jurgens et al.
	Sea Ranch	38.7152058	-123.463208	12 Jun 2014	3	1 - 10	NA		YES	X	MARINe
	Sea Ranch	38.7152058	-123.463208	15 Jun 2015	0	0	NA		YES	X	MARINe
	Phillips Gulch	38.5849289	-123.3487635	2010	9	1 - 10	NA		YES	X	Jurgens et al.
	Phillips Gulch	38.5849289	-123.3487635	2012	0	0	NA		YES	X	Jurgens et al.
	Gerstle Cove	38.5641932	-123.3326109	2010	8	1 - 10	NA		YES	X	Jurgens et al.
	Gerstle Cove	38.5641932	-123.3326109	18 May 2011	7	1 - 10	NA		YES	X	MARINe
	Windermere Point	38.5254845	-123.2765406	2010	4	1 - 10	NA			X	Jurgens et al.
	Windermere Point	38.5254845	-123.2765406	29 Jun 2010	13	>10	NA		YES	X	MARINe
	Windermere Point	38.5254845	-123.2765406	8 May 2011	9	1 - 10	NA		YES	X	MARINe
	Windermere Point	38.5254845	-123.2765406	2012	0	0	NA		YES	X	Jurgens et al.
	Marshall Gulch	38.3696542	-123.082646	21 Jul 2016	0 (1.3 obs. hours)	0	0	1.3	YES	X	Cohen TC
	Miwok Beach	38.3604878	-123.0776459	9 May 2016	0 (1 obs. hour)	0	0	1	YES	X	Cohen TC
	Miwok Beach	38.3604878	-123.0776459	10 May 2016	0 (1.5 obs. hours)	0	0	1.5		X	Cohen TC
	Miwok Beach	38.3604878	-123.0776459	11 May 2016	0 (2 obs. hours)	0	0	2		X	Cohen TC
	Bodega Marine Reserve	38.3181454	-123.0744303	2001	124	>100	NA		YES	X	Jurgens et al.
	Bodega Marine Reserve	38.3181454	-123.0744303	2003	65	>10	NA			X	Jurgens et al.
	Bodega Marine Reserve	38.3181454	-123.0744303	2004	31	>10	NA			X	Jurgens et al.
	Bodega Marine Reserve	38.3181454	-123.0744303	2010	17	>10	NA		YES	X	Jurgens et al.
	Bodega Marine Reserve	38.3181454	-123.0744303	2012	0	0	NA		YES	X	Jurgens et al.
	Bodega Head	38.3110444	-123.0748682	2010	21	>10	NA		YES	X	Jurgens et al.
	Bodega Head	38.3110444	-123.0748682	2012	0	0	NA		YES	X	Jurgens et al.
	Santa Maria Creek	38.0316645	-122.8656213	2002	10	1 - 10	NA		YES		Jurgens et al.
	Santa Maria Creek	38.0316645	-122.8656213	15 Jul 2014	2	1 - 10	NA		YES		MARINe
	Chimney Rock	37.9896664	-122.9726404	2010	6	1 - 10	NA		YES		Jurgens et al.
	Bolinas Point	37.9035533	-122.7359637	2002	4	1 - 10	NA				Jurgens et al.
	Bolinas Point	37.9035533	-122.7359637	2005	7	1 - 10	NA		YES		Jurgens et al.
	Bolinas Point	37.9035533	-122.7359637	2008	5	1 - 10	NA				Jurgens et al.
	Palomarin	37.9342931	-122.7493443	2012	1	1 - 10	NA		YES		Jurgens et al.
	Duxbury Reef	37.9082079	-122.7360016	2008	1	1 - 10	NA		YES		Jurgens et al.
	Duxbury Reef	37.9082079	-122.7360016	2012	16	>10	NA		YES		Jurgens et al.
	Duxbury Reef	37.9082079	-122.7360016	17 Jul 2014	20	>10	5	4	YES		Cohen TC
	Duxbury Reef	37.9082079	-122.7360016	18 Jul 2014	16	>10	NA				Cohen other
	Duxbury Reef	37.9082079	-122.7360016	27 Oct 2015	0 (5 obs. hours)	0	0	5	YES		Cohen TC
	Duxbury Reef	37.9082079	-122.7360016	9 Jan 2016	0 (2.7 obs. hours)	0	0	2.7	YES		Cohen TC
	Duxbury Reef	37.9082079	-122.7360016	5 Jun 2016	0 (6.7 obs. hours)	0	0	6.7			Cohen TC
	Slide Ranch	37.873302	-122.5990478	17 Aug 1989	240	>100	NA				MARINe
	Slide Ranch	37.873302	-122.5990478	6 Aug 1990	75	>10	NA				MARINe
	Slide Ranch	37.873302	-122.5990478	14 Aug 1991	68	>10	NA				MARINe
	Slide Ranch	37.873302	-122.5990478	20 Apr 1992	252	>10	NA				MARINe
	Slide Ranch	37.873302	-122.5990478	30 Jul 1992	63	>10	NA				MARINe
	Slide Ranch	37.873302	-122.5990478	21 Nov 1992	9	1 - 10	NA				MARINe
	Slide Ranch	37.873302	-122.5990478	26 May 1994	5	1 - 10	NA				MARINe
	Slide Ranch	37.873302	-122.5990478	25 Jun 2001	27	>10	NA				MARINe
	Slide Ranch	37.873302	-122.5990478	12 Dec 2001	132	>100	NA				MARINe
	Slide Ranch	37.873302	-122.5990478	25 Jun 2002	384	>100	NA				MARINe
	Slide Ranch	37.873302	-122.5990478	3 Dec 2002	600	>500	NA		YES		MARINe
	Slide Ranch	37.873302	-122.5990478	3 Jun 2003	320	>100	NA				MARINe
	Slide Ranch	37.873302	-122.5990478	20 Jan 2004	164	>10	NA				MARINe
	Slide Ranch	37.873302	-122.5990478	5 Feb 2005	174	>10	NA				MARINe
	Slide Ranch	37.873302	-122.5990478	24 Jun 2005	447	>10	NA				MARINe
	Slide Ranch	37.873302	-122.5990478	5 Jun 2012	12	>10	NA		YES		MARINe
	Slide Ranch	37.873302	-122.5990478	29 Jan 2014	1	1 - 10	NA				MARINe
	Slide Ranch	37.873302	-122.5990478	16 Jun 2014	48	>10	NA		YES		MARINe
	Slide Ranch	37.873302	-122.5990478	18 Jun 2014	30	>10	NA				MARINe
	Slide Ranch	37.873302	-122.5990478	18 Jun 2015	21	>10	NA				Cohen other
	Slide Ranch	37.873302	-122.5990478	30 Jun 2015	35	>10	37.33	0.937584	YES		Cohen TC
	Slide Ranch	37.873302	-122.5990478	27 Sep 2015	30	>10	6.42857	4.66667			Cohen TC
	Slide Ranch	37.873302	-122.5990478	28 Sep 2015	2	1 - 10	1.33333	1.5			Cohen TC
	Slide Ranch	37.873302	-122.5990478	29 Sep 2015	20	>10	NA				Cohen other
	Slide Ranch	37.873302	-122.5990478	27 Nov 2015	13	>10	6.5	2			Cohen TC
	Slide Ranch	37.873302	-122.5990478	10 Jan 2016	0 (4.1 obs. hours)	0	0	4.1	YES		Cohen TC
	Slide Ranch	37.873302	-122.5990478	8 Jul 2016	0 (4 obs. hours)	0	0	4			Cohen TC
	Muir Beach	37.8664431	-122.5948647	25 Nov 2011	4	1 - 10	4.61538	0.866667			Cohen TC
	Muir Beach	37.8664431	-122.5948647	28 Nov 2011	20	>10	NA		YES		Cohen other
	Muir Beach	37.8664431	-122.5948647	10 Jan 2012	20	>10	NA				Cohen other
	Muir Beach	37.8664431	-122.5948647	10 Jan 2012	4	1 - 10	3.2	1.25			Cohen TC
	Muir Beach	37.8664431	-122.5948647	21 Jun 2012	125	>10	NA				Cohen other
	Muir Beach	37.8664431	-122.5948647	17 Jul 2012	135	>100	NA		YES		Cohen other
	Muir Beach	37.8664431	-122.5948647	18 Jul 2012	125	>10	NA				Cohen other
	Muir Beach	37.8664431	-122.5948647	3 Aug 2012	120	>10	NA				Cohen other
	Muir Beach	37.8664431	-122.5948647	15 Oct 2012	96	>10	NA				Cohen other
	Muir Beach	37.8664431	-122.5948647	17 Oct 2012	86	>10	NA				Cohen other
	Muir Beach	37.8664431	-122.5948647	18 Oct 2012	27	>10	NA				Cohen other
	Muir Beach	37.8664431	-122.5948647	29 Oct 2012	104	>10	NA				Cohen other
	Muir Beach	37.8664431	-122.5948647	30 Oct 2012	78	>10	NA				Cohen other
	Muir Beach	37.8664431	-122.5948647	13 Dec 2013	34	>10	NA		YES		Cohen other
	Muir Beach	37.8664431	-122.5948647	16 Jan 2014	40	>10	NA		YES		Cohen other
	Muir Beach	37.8664431	-122.5948647	28 Jan 2014	11	>10	NA				Cohen other
	Muir Beach	37.8664431	-122.5948647	3 Apr 2014	15	>10	NA				Cohen other
	Muir Beach	37.8664431	-122.5948647	19 May 2014	9	1 - 10	NA				Cohen other
	Muir Beach	37.8664431	-122.5948647	21 May 2014	11	>10	NA				Cohen other
	Muir Beach	37.8664431	-122.5948647	17 Feb 2015	7	>10	1.07	6.54206	YES		Cohen TC
	Muir Beach	37.8664431	-122.5948647	28 Oct 2015	0 (2.1 obs. hours)	0	0	2.1			Cohen TC
	Muir Beach	37.8664431	-122.5948647	21 Jun 2016	0 (3.1 obs. hours)	0	0	3.1	YES		Cohen TC
	Rodeo Beach	37.8283004	-122.5414798	12 Dec 2011	7	1 - 10	5.6	1.25	YES		Cohen TC
	Rodeo Beach	37.8283004	-122.5414798	13 Jun 2014	30	>10	NA		YES		Cohen other
	Rodeo Beach	37.8283004	-122.5414798	16 Feb 2015	0 (4.7 obs. hours)	0	0	4.7	YES		Cohen TC
	Rodeo Beach	37.8283004	-122.5414798	18 Aug 2016	0 (0.7 obs. hours)	0	0	0.7	YES		Cohen TC
	Pt Bonita	37.8156098	-122.5317174	8 Jan 2001	2	1 - 10	NA				MARINe
	Pt Bonita	37.8156098	-122.5317174	26 Jan 2002	116	>100	NA				MARINe
	Pt Bonita	37.8156098	-122.5317174	28 Jan 2002	33	>10	NA				MARINe
	Pt Bonita	37.8156098	-122.5317174	26 Jun 2002	110	>100	NA				MARINe
	Pt Bonita	37.8156098	-122.5317174	30 Jan 2003	644	>500	NA		YES		MARINe
	Pt Bonita	37.8156098	-122.5317174	2 Jun 2003	240	>100	NA				MARINe
	Pt Bonita	37.8156098	-122.5317174	22 Jan 2004	260	>100	NA				MARINe
	Pt Bonita	37.8156098	-122.5317174	7 Jun 2004	104	>100	NA				MARINe
	Pt Bonita	37.8156098	-122.5317174	6 Feb 2005	263	>101	NA				MARINe
	Pt Bonita	37.8156098	-122.5317174	26 Jun 2005	29	>10	NA				MARINe
	Pt Bonita	37.8156098	-122.5317174	13 Jul 2010	191	>100	NA		YES		MARINe
	Pt Bonita	37.8156098	-122.5317174	3 Jun 2011	18	>10	NA		YES		MARINe
	Pt Bonita	37.8156098	-122.5317174	28 Jan 2014	48	>10	NA		YES		MARINe
	Pt Bonita	37.8156098	-122.5317174	27 Mar 2014	20	>10	NA				Cohen other
	Pt Bonita	37.8156098	-122.5317174	17 Jun 2015	7	1 - 10	1.34615	5.2	YES		Cohen TC
	Pt Bonita	37.8156098	-122.5317174	24 Nov 2015	0 (2.4 obs. hours)	0	0	2.4			Cohen TC
	Pt Bonita	37.8156098	-122.5317174	6 Feb 2016	0 (0.3 obs. hours)	0	0	0.3	YES		Cohen TC
	Pt Bonita	37.8156098	-122.5317174	6 Jul 2016	0 (1.2 obs. hours)	0	0	1.2			Cohen TC
	China Beach	37.7879478	-122.4935645	13 Nov 2011	16	>10	NA		YES		Cohen other
	China Beach	37.7879478	-122.4935645	23 Nov 2011	12	>10	NA				Cohen other
	China Beach	37.7879478	-122.4935645	1 Jul 2012	175	>100	656	0.266768	YES		Cohen TC
	China Beach	37.7879478	-122.4935645	26 Nov 2015	0 (2 obs. hours)	0	0	2	YES		Cohen TC
	China Beach	37.7879478	-122.4935645	16 Nov 2016	0 (3 obs. hours)	0	0	3	YES		Cohen TC
	Mile Rock	37.7875872	-122.5082492	1 Oct 2011	28	>10	NA		YES		Cohen other
	Mile Rock	37.7875872	-122.5082492	12 Nov 2011	20	>10	NA				Cohen other
	Mile Rock	37.7875872	-122.5082492	4 Apr 2012	5	1 - 10	3.33333	1.5	YES		Cohen TC
	Mile Rock	37.7875872	-122.5082492	8 Apr 2012	5	1 - 10	NA				Cohen other
	Mile Rock	37.7875872	-122.5082492	24 Jun 2013	45	>10	675	0.0666667			Cohen TC
	Mile Rock	37.7875872	-122.5082492	23 Jul 2013	290	>100	2900	0.1	YES		Cohen TC
	Mile Rock	37.7875872	-122.5082492	19 Oct 2013	5	1 - 10	NA				Cohen other
	Mile Rock	37.7875872	-122.5082492	15 Nov 2013	10	1 - 10	NA				Cohen other
	Mile Rock	37.7875872	-122.5082492	14 Dec 2013	39	>10	NA				Cohen other
	Mile Rock	37.7875872	-122.5082492	1 Oct 2014	30	>10	NA		YES		Cohen other
	Mile Rock	37.7875872	-122.5082492	20 May 2015	3	1 - 10	0.473684	6.33333			Cohen TC
	Mile Rock	37.7875872	-122.5082492	12 Jun 2015	5	1 - 10	2.5	2	YES		Cohen TC
	Mile Rock	37.7875872	-122.5082492	6 Dec 2015	6	1 - 10	3	2	YES		Cohen TC
	Mile Rock	37.7875872	-122.5082492	17 Sep 2016	0 (10 obs. hours)	0	0	10			Cohen TC
	Mussel Rock	37.6672019	-122.4996749	2008 -2009	75	>10	25	3	YES		Cohen other
	Mussel Rock	37.6672019	-122.4996749	27 Oct 2011	0	0	NA		YES		Cohen other
	Mussel Rock	37.6672019	-122.4996749	6 Jul 2012	0 (3.3 obs. hours)	0	0	3.3	YES		Cohen TC
	Mussel Rock	37.6672019	-122.4996749	17 Jul 2014	0 (5 obs. hours)	0	0	5	YES		Cohen TC
	Mussel Rock	37.6672019	-122.4996749	15 Feb 2015	0	0	NA		YES		Cohen other
	Mussel Rock	37.6672019	-122.4996749	7 Jul 2016	0 (2 obs. hours)	0	NA	2	YES		Cohen other
	Fitzgerald/Frenchman	37.5237692	-122.5197076	11 Jan 2012	0	0	NA		YES		Cohen other
	Fitzgerald/Frenchman	37.5237692	-122.5197076	23 Nov 2015	1	1 - 10	0.22	4.54545	YES		Cohen TC
	Fitzgerald/Frenchman	37.5237692	-122.5197076	7 Jun 2016	1	1 - 10	0.240964	4.15			Cohen TC
	Fitzgerald/Frenchman	37.5237692	-122.5197076	22 Jun 2016	9	1 - 10	0.5625	16	YES		Cohen TC
	Fitzgerald/Frenchman	37.5237692	-122.5197076	5 Jul 2016	1	1 - 10	0.267857	3.73333			Cohen TC
	Bean Hollow	37.2304922	-122.4208582	2 Nov 2011	10	1 - 10	NA		YES		Cohen other
	Bean Hollow	37.2304922	-122.4208582	2014 no date	20	>10	NA		YES		Cohen other
	Bean Hollow	37.2304922	-122.4208582	25 Nov 2015	2	1 - 10	0.195122	10.25	YES		Cohen TC
	Pigeon Point	37.1829245	-122.3949909	15 Jul 2011	22	>10	NA		YES		Cohen other
	Pigeon Point	37.1829245	-122.3949909	10 Feb 2013	38	>10	NA		YES		Cohen other
	Pigeon Point	37.1829245	-122.3949909	6 Oct 2013	15	>10	NA				Cohen other
	Pigeon Point	37.1829245	-122.3949909	16 Nov 2013	10	1 - 10	NA				Cohen other
	Pigeon Point	37.1829245	-122.3949909	2 Jul 2015	19	>10	NA				Cohen other
	Pigeon Point	37.1829245	-122.3949909	16 Jul 2015	71	>10	47.3333	1.5	YES		Cohen TC
	Pigeon Point	37.1829245	-122.3949909	26 Oct 2015	11	>10	3.14	3.50318			Cohen TC
	Pigeon Point	37.1829245	-122.3949909	23 Jun 2016	13	>10	0.77	16.8831			Cohen TC
	Pigeon Point	37.1829245	-122.3949909	6 Jul 2016	60	>10	30	2	YES		Cohen TC
	Pigeon Point	37.1829245	-122.3949909	14 Nov 2016	46	>10	36.8	1.25			Cohen TC
	Greyhound Rock	37.0569244	-122.2607117	13 Jan 2009	30	>10	NA		YES		Cohen other
	Scott Creek	37.0242215	-122.224743	7 Oct 2010	6	1 - 10	NA		YES		MARINe
	Scott Creek	37.0242215	-122.224743	25 Oct 2011	3	1 - 10	NA		YES		MARINe
	Scott Creek	37.0242215	-122.224743	19 Oct 2013	91	>10	NA		YES		MARINe
	Scott Creek	37.0242215	-122.224743	26 Mar 2014	23	>10	NA				MARINe
	Scott Creek	37.0242215	-122.224743	8 Oct 2014	59	>10	NA		YES		MARINe
	Scott Creek	37.0242215	-122.224743	13 Apr 2015	26	>10	NA				MARINe
	Scott Creek	37.0242215	-122.224743	24 Nov 2015	38	>10	NA		YES		MARINe
	Scott Creek	37.0242215	-122.224743	17 Mar 2016	5	1 - 10	NA		YES		MARINe
	Terrace Point	36.948411	-122.0675791	27 Mar 2014	2	1 - 10	NA		YES		MARINe
	Terrace Point	36.948411	-122.0675791	9 Oct 2014	1	1 - 10	NA				MARINe
	Terrace Point	36.948411	-122.0675791	6 May 2016	2	1 - 10	NA		YES		MARINe
	Hopkins	36.620265	-121.9063916	18 Apr 2011	16	>10	NA		YES		MARINe
	Hopkins	36.620265	-121.9063916	18 Oct 2013	6	1 - 10	NA		YES		MARINe
	Hopkins	36.620265	-121.9063916	30 Apr 2014	55	>10	NA		YES		MARINe
	Hopkins	36.620265	-121.9063916	21 Nov 2014	23	>10	NA				MARINe
	Hopkins	36.620265	-121.9063916	24 Apr 2015	2	1 - 10	NA				MARINe
	Hopkins	36.620265	-121.9063916	22 May 2015	5	1 - 10	NA				MARINe
	Hopkins	36.620265	-121.9063916	29 Oct 2015	10	1 - 10	NA		YES		MARINe
	Hopkins	36.620265	-121.9063916	18 Mar 2016	7	1 - 10	NA		YES		MARINe
	Point Pinos	36.63795853	-121.93758	26 Oct 2011	19	>10	NA		YES		MARINe
	Point Pinos	36.63795853	-121.93758	14 Jun 2014	20	>10	NA		YES		Cohen other
	Point Pinos	36.63795853	-121.93758	29 Oct 2015	14	>10	NA		YES		Cohen other
	Stillwater	36.56087112	-121.94053	27 Oct 2011	7	1 - 10	NA		YES		MARINe
	Stillwater	36.56087112	-121.94053	4 Nov 2013	175	>100	NA		YES		MARINe
	Stillwater	36.56087112	-121.94053	17 Apr 2014	77	>10	NA		YES		MARINe
	Stillwater	36.56087112	-121.94053	5 Nov 2014	22	>10	NA				MARINe
	Stillwater	36.56087112	-121.94053	20 Apr 2015	14	>10	NA				MARINe
	Stillwater	36.56087112	-121.94053	26 Oct 2015	17	>10	NA		YES		MARINe
	Stillwater	36.56087112	-121.94053	12 Apr 2016	25	>10	NA		YES		MARINe
	Point Lobos	36.5164988	-121.9411876	1 Nov 2013	30	>10	NA		YES		MARINe
	Point Lobos	36.5164988	-121.9411876	1 May 2014	21	>10	NA		YES		MARINe
	Point Lobos	36.5164988	-121.9411876	4 Nov 2014	6	1 - 10	NA				MARINe
	Point Lobos	36.5164988	-121.9411876	24 Apr 2015	15	>10	NA		YES		MARINe
	Point Lobos	36.5164988	-121.9411876	23 Nov 2015	15	>10	NA				MARINe
	Point Lobos	36.5164988	-121.9411876	13 Apr 2016	4	1 - 10	NA		YES		MARINe
	Andrew Molera	36.2884232	-121.8464607	21 Nov 2010	4	1 - 10	NA		YES		MARINe
	Andrew Molera	36.2884232	-121.8464607	23 Nov 2011	4	1 - 10	NA		YES		MARINe
	Andrew Molera	36.2884232	-121.8464607	2 Nov 2013	20	>10	NA		YES		MARINe
	Andrew Molera	36.2884232	-121.8464607	20 Apr 2014	12	>10	NA				MARINe
	Andrew Molera	36.2884232	-121.8464607	8 Nov 2014	31	>10	NA		YES		MARINe
	Andrew Molera	36.2884232	-121.8464607	22 Apr 2015	15	>10	NA				MARINe
	Andrew Molera	36.2884232	-121.8464607	28 Oct 2015	18	>10	NA		YES		MARINe
	Andrew Molera	36.2884232	-121.8464607	10 Apr 2016	14	>10	NA		YES		MARINe
	Mill Creek	36.3686409	-121.8385935	19 Apr 2011	16	>10	NA		YES		MARINe
	Mill Creek	36.3686409	-121.8385935	18 Nov 2013	34	>10	NA		YES		MARINe
	Mill Creek	36.3686409	-121.8385935	19 Apr 2014	35	>10	NA				MARINe
	Mill Creek	36.3686409	-121.8385935	6 Nov 2014	56	>10	NA		YES		MARINe
	Mill Creek	36.3686409	-121.8385935	21 Apr 2015	18	>10	NA		YES		MARINe
	Mill Creek	36.3686409	-121.8385935	27 Oct 2015	6	1 - 10	NA				MARINe
	Mill Creek	36.3686409	-121.8385935	11 Apr 2016	22	>10	NA		YES		MARINe
	Point Sierra Nevada	35.72882843	121.31866	17 Apr 2014	1	1 - 10	NA				MARINe
	Point Sierra Nevada	35.72882843	121.31866	22 Nov 2014	2	1 - 10	NA		YES		MARINe
	Point Sierra Nevada	35.72882843	121.31866	20 Apr 2015	4	1 - 10	NA		YES		MARINe
	Point Sierra Nevada	35.72882843	121.31866	27 Oct 2015	1	1 - 10	NA				MARINe
	Point Sierra Nevada	35.72882843	121.31866	17 Oct 2016	6	1 - 10	NA		YES		MARINe
	Cayucos	35.4476221	-120.9054245	6 Nov 2010	4	1 - 10	NA		YES		MARINe
	Cayucos	35.4476221	-120.9054245	29 Oct 2011	4	1 - 10	NA		YES		MARINe
	Cayucos	35.4476221	-120.9054245	28 Apr 2013	1	1 - 10	NA				MARINe
	Cayucos	35.4476221	-120.9054245	5 Nov 2013	11	>10	NA		YES		MARINe
	Cayucos	35.4476221	-120.9054245	19 Apr 2014	9	1 - 10	NA				MARINe
	Cayucos	35.4476221	-120.9054245	23 Nov 2014	17	>10	NA		YES		MARINe
	Cayucos	35.4476221	-120.9054245	21 Apr 2015	4	1 - 10	NA		YES		MARINe
	Cayucos	35.4476221	-120.9054245	28 Oct 2015	1	1 - 10	NA				MARINe
	Cayucos	35.4476221	-120.9054245	18 Oct 2016	6	1 - 10	NA		YES		MARINe
	Stairs	34.73038101	120.61546	18 Apr 2010	3	1 - 10	NA		YES		MARINe
	Stairs	34.73038101	120.61546	22 Nov 2010	1	1 - 10	NA				MARINe
	Stairs	34.73038101	120.61546	16 Nov 2013	3	1 - 10	NA		YES		MARINe
	Stairs	34.73038101	120.61546	8 Nov 2014	15	>10	NA		YES		MARINe
	Stairs	34.73038101	120.61546	19 Mar 2015	2	1 - 10	NA				MARINe
	Stairs	34.73038101	120.61546	23 Nov 2015	5	1 - 10	NA		YES		MARINe
	Stairs	34.73038101	120.61546	8 May 2016	20	>10	NA		YES		MARINe
	Boat House	34.55387878	-120.61167	16 Apr 2010	1	1 - 10	NA				MARINe
	Boat House	34.55387878	-120.61167	20 Nov 2010	2	1 - 10	NA		YES		MARINe
	Boat House	34.55387878	-120.61167	15 Mar 2011	2	1 - 10	NA		YES		MARINe
	Boat House	34.55387878	-120.61167	15 Nov 2013	3	1 - 10	NA		YES		MARINe
	Boat House	34.55387878	-120.61167	20 Nov 2014	2	1 - 10	NA		YES		MARINe
	Boat House	34.55387878	-120.61167	16 Mar 2015	2	1 - 10	NA		YES		MARINe
	Boat House	34.55387878	-120.61167	22 Nov 2015	1	1 - 10	NA				MARINe
	Boat House	34.55387878	-120.61167	16 Nov 2016	1	1 - 10	NA				MARINe
